# Supplementary material for: Impact of Doxycycline on COVID-19 Patients with Risk Factors: DYNAMIC, a Multi-Centre, Randomised, Placebo-Controlled, Double-Blind Trial
Source: Research Square preprint supplement (doi:10.21203/rs.3.rs-29729/v2), 2020-12-06
Supplement: Supplementary file 1 [file 519ef45667a7184a33e38f51.docx]

| **Inclusion Criteria** | **Exclusion Criteria** |
| --- | --- |
| - Patient (male , female) 45 years or older and have at least one of the following risk factors of disease degradation described by the French High Council of Public Health:   - ≥70 years old,   - BMI > 30,   - cardiovascular history (stroke, coronary artery disease, complicated hypertension, cardiac surgery, NYHA III or IV heart failure),   - insulin-dependent diabetes which is unbalanced or secondary complicated,   - respiratory disease likely to decompensate for viral infection,   - patients with chronic renal failure on dialysis,   - cancer patients under treatment - Patient must have signed an informed consent. - Symptomatic patient, having at least one of the following symptoms without hospitalisation criteria: - General symptoms: fever, headache, asthenia - ENT symptoms: sore throat, rhinorrhea - Respiratory symptoms: dyspnoea, breathing rate > 22/min, - Digestive symptoms: nausea, vomiting, diarrhea - Patient with social security . | - Patient with a lactose intolerance. - Patient with a condition requiring immediate hospitalization whatever the medical reason. - Patient with more than 5 days of clinical disorders at inclusion visit. - Patient with an history of allergy to tetracyclin. - Pregnant or nursing women. - Patient enrolled in another clinical trial. - Patient with a photosensitive cutaneous disease. - Patient treated with oral anticoagulant therapies. - Patient treated with oral retinoids : isotretinoin, alotretinoin, acitretin. - Patient treated with vitamin A. - Patient treated with a systemic antibiotherapy during treatment duration. - Patient treated with barbiturates, carbamazepine or phenytoin. - Patient with traitement that may have an effect on SARS-CoV2 infection : chloroquin, hydroxychloroquin, remdesivir, ganciclovir, acyclovir, ribavirin, lopinavir/ritonavir - Adults under legal protection |
